# Supplementary material for: Biogeography and environmental conditions shape bacteriophage-bacteria networks across the human microbiome
Source: PubMed Central journal article supplement (PMC5927471; doi:10.1371/journal.pcbi.1006099), 2018-04-18
Supplement: pcbi.1006099.s015.pdf [file pcbi.1006099.s015.pdf]

1 **Table S1**

| Study                 | Citation       | Virome Quality Control Measures                                                                                                                                                                                                                                                                                                                                                              |
|-----------------------|----------------|----------------------------------------------------------------------------------------------------------------------------------------------------------------------------------------------------------------------------------------------------------------------------------------------------------------------------------------------------------------------------------------------|
| Diet & the Gut Virome | Minot, 2011    | <ul style="list-style-type: none"> <li>• 16S rRNA gene qPCR revealed reduction in bacterial DNA of at least 10,000X.</li> <li>• Alignment of shotgun sequences revealed 35X reduction in 16S rRNA gene alignments in virome compared to bacteria shotgun.</li> <li>• Electron microscopy and nucleic acid stain techniques visually confirmed lack of bacteria in virome samples.</li> </ul> |
| Skin Virome           | Hannigan, 2015 | <ul style="list-style-type: none"> <li>• Significant reduction in reads mapping to 16S rRNA gene sequence, compared to bacteria shotgun dataset.</li> <li>• Significant reduction in reads mapping to human genome, compared to bacteria shotgun dataset.</li> <li>• Average viral relative abundance of 0.4% in bacterial shotgun dataset.</li> </ul>                                       |
| Twin Gut Virome       | Reyes, 2010    | <ul style="list-style-type: none"> <li>• Confirmation that 2.5% of bacterial shotgun reads mapped to virome, and 76% of virome reads matched the shotgun 2.5%.</li> </ul>                                                                                                                                                                                                                    |
