# Supplementary material for: Biogeography and environmental conditions shape bacteriophage-bacteria networks across the human microbiome
Source: PubMed Central journal article supplement (PMC5927471; doi:10.1371/journal.pcbi.1006099), 2018-04-18
Supplement: pcbi.1006099.s016.pdf [file pcbi.1006099.s016.pdf]

1 *Table S2*

| Bacterial Host             | Bacteriophage              | Interaction | Citation                       |
|----------------------------|----------------------------|-------------|--------------------------------|
| Achromobacter xylosoxidans | Pbunalikevirus phiFenriz   | Negative    | Malki, <i>et al.</i> 2015.     |
| Achromobacter xylosoxidans | Pbunalikevirus phiHabibi   | Negative    | Malki, <i>et al.</i> 2015.     |
| Achromobacter xylosoxidans | Pbunalikevirus phiMoody    | Negative    | Malki, <i>et al.</i> 2015.     |
| Achromobacter xylosoxidans | Pbunalikevirus phiVader    | Negative    | Malki, <i>et al.</i> 2015.     |
| Acinetobacter baumannii    | Pseudomonas phage PA1phi   | Negative    | Kim <i>et al.</i> 2012.        |
| Acinetobacter baumannii    | Acinetobacter phage Petty  | Positive    | Edwards <i>et al.</i> 2015.    |
| Arthrobacter sp.           | Pbunalikevirus phiHabibi   | Positive    | Malki, <i>et al.</i> 2015.     |
| Arthrobacter sp.           | Pbunalikevirus phiVader    | Positive    | Malki, <i>et al.</i> 2015.     |
| Arthrobacter sp.           | Pbunalikevirus phiMoody    | Positive    | Malki, <i>et al.</i> 2015.     |
| Arthrobacter sp.           | Pbunalikevirus phiFenriz   | Positive    | Malki, <i>et al.</i> 2015.     |
| Arthrobacter sulfonivorans | Pbunalikevirus phiHabibi   | Positive    | Malki, <i>et al.</i> 2015.     |
| Arthrobacter sulfonivorans | Pbunalikevirus phiVader    | Positive    | Malki, <i>et al.</i> 2015.     |
| Arthrobacter sulfonivorans | Pbunalikevirus phiMoody    | Positive    | Malki, <i>et al.</i> 2015.     |
| Arthrobacter sulfonivorans | Pbunalikevirus phiFenriz   | Positive    | Malki, <i>et al.</i> 2015.     |
| Bacillus pumilus           | Enterobacteria phage phi92 | Negative    | Schwarzer, <i>et al.</i> 2012. |
| Bacillus pumilus           | Enterobacteria phage K1F   | Negative    | Schwarzer, <i>et al.</i> 2012. |
| Bacillus amyloliquefaciens | Enterobacteria phage phi92 | Negative    | Schwarzer, <i>et al.</i> 2012. |
| Bacillus amyloliquefaciens | Enterobacteria phage K1F   | Negative    | Schwarzer, <i>et al.</i> 2012. |
| Bacillus subtilis          | Enterobacteria phage phi92 | Negative    | Schwarzer, <i>et al.</i> 2012. |
| Bacillus subtilis          | Enterobacteria phage K1F   | Negative    | Schwarzer, <i>et al.</i> 2012. |

| Bacterial Host             | Bacteriophage                     | Interaction | Citation                        |
|----------------------------|-----------------------------------|-------------|---------------------------------|
| Burkholderia cenocepacia   | Burkholderia phage KL1            | Positive    | Hargreaves, <i>et al.</i> 2014. |
| Burkholderia cenocepacia   | Burkholderia phage KS14           | Positive    | Edwards <i>et al.</i> 2015.     |
| Chryseobacterium sp.       | Pbunalikevirus phiHabibi          | Positive    | Malki, <i>et al.</i> 2015.      |
| Chryseobacterium sp.       | Pbunalikevirus phiFenriz          | Positive    | Malki, <i>et al.</i> 2015.      |
| Chryseobacterium sp.       | Pbunalikevirus phiMoody           | Positive    | Malki, <i>et al.</i> 2015.      |
| Chryseobacterium sp.       | Pbunalikevirus phiVader           | Positive    | Malki, <i>et al.</i> 2015.      |
| Clostridium perfringens    | Clostridium phage phiCP7R         | Positive    | Edwards <i>et al.</i> 2015.     |
| Clostridium perfringens    | Clostridium phage phiZP2          | Positive    | Edwards <i>et al.</i> 2015.     |
| Corynebacterium glutamicum | Corynebacterium phage P1201       | Positive    | Edwards <i>et al.</i> 2015.     |
| Cronobacter sakazakii      | Cronobacter phage CR5             | Positive    | Edwards <i>et al.</i> 2015.     |
| Escherichia coli           | Pbunalikevirus phiHabibi          | Positive    | Malki, <i>et al.</i> 2015.      |
| Escherichia coli           | Pbunalikevirus phiMoody           | Positive    | Malki, <i>et al.</i> 2015.      |
| Escherichia coli           | Pbunalikevirus phiFenriz          | Positive    | Malki, <i>et al.</i> 2015.      |
| Escherichia coli           | Pbunalikevirus phiVader           | Positive    | Malki, <i>et al.</i> 2015.      |
| Escherichia coli           | Pseudomonas aeruginosa phage F116 | Negative    | Jensen <i>et al.</i> 1998.      |
| Escherichia coli           | Pseudomonas phage D3              | Negative    | Jensen <i>et al.</i> 1998.      |
| Enterobacter aerogenes     | Pseudomonas phage PA1phi          | Negative    | Kim <i>et al.</i> 2012.         |
| Erwinia amylovora          | Erwinia phage phiEaH2             | Positive    | Edwards <i>et al.</i> 2015.     |
| Escherichia coli           | Pseudomonas phage PA1phi          | Negative    | Kim <i>et al.</i> 2012.         |
| Escherichia coli           | Enterobacteria phage K1F          | Positive    | Schwarzer, <i>et al.</i> 2012.  |
| Escherichia coli           | Enterobacteria phage phi92        | Positive    | Schwarzer, <i>et al.</i> 2012.  |
| Klebsiella pneumoniae      | Klebsiella phage KP15             | Positive    | Edwards <i>et al.</i> 2015.     |
| Lactococcus lactis         | Lactococcus phage 949             | Positive    | Edwards <i>et al.</i> 2015.     |
| Lactococcus lactis         | Lactococcus phage phiL47          | Positive    | Edwards <i>et al.</i> 2015.     |
| Listeria monocytogenes     | Pseudomonas phage PA1phi          | Positive    | Kim <i>et al.</i> 2012.         |
| Microbacterium sp.         | Pbunalikevirus phiVader           | Positive    | Malki, <i>et al.</i> 2015.      |
| Microbacterium sp.         | Pbunalikevirus phiMoody           | Positive    | Malki, <i>et al.</i> 2015.      |

| Bacterial Host               | Bacteriophage                        | Interaction | Citation                       |
|------------------------------|--------------------------------------|-------------|--------------------------------|
| Microbacterium sp.           | Pbunalikevirus phiHabibi             | Positive    | Malki, <i>et al.</i> 2015.     |
| Microbacterium sp.           | Pbunalikevirus phiFenriz             | Positive    | Malki, <i>et al.</i> 2015.     |
| Mycobacterium<br>smegmatis   | Mycobacterium phage SWU1             | Positive    | Edwards <i>et al.</i> 2015.    |
| Pseudomonas aeruginosa       | Pbunalikevirus phiMoody              | Positive    | Malki, <i>et al.</i> 2015.     |
| Pseudomonas aeruginosa       | Pbunalikevirus phiVader              | Positive    | Malki, <i>et al.</i> 2015.     |
| Pseudomonas aeruginosa       | Pbunalikevirus phiFenriz             | Positive    | Malki, <i>et al.</i> 2015.     |
| Pseudomonas aeruginosa       | Pbunalikevirus phiHabibi             | Positive    | Malki, <i>et al.</i> 2015.     |
| Pseudomonas aeruginosa       | Pseudomonas aeruginosa phage<br>F116 | Positive    | Jensen <i>et al.</i> 1998.     |
| Pseudomonas aeruginosa       | Pseudomonas phage D3                 | Positive    | Jensen <i>et al.</i> 1998.     |
| Photobacterium<br>angustum   | Vibrio phage KVP40                   | Negative    | Matsuza <i>et al.</i> 1992.    |
| Photobacterium<br>leiognathi | Vibrio phage KVP40                   | Positive    | Matsuza <i>et al.</i> 1992.    |
| Propionibacterium acnes      | Propionibacterium phage<br>PHL112N00 | Positive    | Edwards <i>et al.</i> 2015.    |
| Pseudomonas aeruginosa       | Pseudomonas phage PA1phi             | Positive    | Kim <i>et al.</i> 2012.        |
| Pseudomonas putida           | Enterobacteria phage K1F             | Negative    | Schwarzer, <i>et al.</i> 2012. |
| Pseudomonas putida           | Enterobacteria phage phi92           | Negative    | Schwarzer, <i>et al.</i> 2012. |
| Ralstonia solanacearum       | Ralstonia phage RSM3                 | Positive    | Edwards <i>et al.</i> 2015.    |
| Ralstonia solanacearum       | Ralstonia phage RSS1                 | Positive    | Edwards <i>et al.</i> 2015.    |
| Sphaerotilus natans          | Pseudomonas aeruginosa phage<br>F116 | Positive    | Jensen <i>et al.</i> 1998.     |
| Sphaerotilus natans          | Pseudomonas phage D3                 | Positive    | Jensen <i>et al.</i> 1998.     |
| Salmonella enterica          | Pbunalikevirus phiFenriz             | Negative    | Malki, <i>et al.</i> 2015.     |
| Salmonella enterica          | Pbunalikevirus phiHabibi             | Negative    | Malki, <i>et al.</i> 2015.     |
| Salmonella enterica          | Salmonella phage FSL SP-058          | Positive    | Edwards <i>et al.</i> 2015.    |
| Salmonella enterica          | Pbunalikevirus phiVader              | Negative    | Malki, <i>et al.</i> 2015.     |
| Salmonella enterica          | Pbunalikevirus phiMoody              | Negative    | Malki, <i>et al.</i> 2015.     |
| Salmonella enterica          | Enterobacteria phage phi92           | Positive    | Schwarzer, <i>et al.</i> 2012. |

| Bacterial Host                    | Bacteriophage                      | Interaction | Citation                       |
|-----------------------------------|------------------------------------|-------------|--------------------------------|
| <i>Salmonella enterica</i>        | Enterobacteria phage K1F           | Negative    | Schwarzer, <i>et al.</i> 2012. |
| <i>Serratia marcescens</i>        | Pseudomonas phage PA1phi           | Negative    | Kim <i>et al.</i> 2012.        |
| <i>Shigella boydii</i>            | Pbunalikevirus phiVader            | Negative    | Malki, <i>et al.</i> 2015.     |
| <i>Shigella boydii</i>            | Pbunalikevirus phiHabibi           | Negative    | Malki, <i>et al.</i> 2015.     |
| <i>Shigella boydii</i>            | Pbunalikevirus phiFenriz           | Negative    | Malki, <i>et al.</i> 2015.     |
| <i>Shigella boydii</i>            | Pbunalikevirus phiMoody            | Negative    | Malki, <i>et al.</i> 2015.     |
| <i>Shigella flexneri</i>          | Pbunalikevirus phiFenriz           | Negative    | Malki, <i>et al.</i> 2015.     |
| <i>Shigella flexneri</i>          | Pbunalikevirus phiVader            | Negative    | Malki, <i>et al.</i> 2015.     |
| <i>Shigella flexneri</i>          | Pbunalikevirus phiMoody            | Negative    | Malki, <i>et al.</i> 2015.     |
| <i>Shigella flexneri</i>          | Pbunalikevirus phiHabibi           | Negative    | Malki, <i>et al.</i> 2015.     |
| <i>Shigella sonnei</i>            | Pseudomonas phage PA1phi           | Positive    | Kim <i>et al.</i> 2012.        |
| <i>Staphylococcus aureus</i>      | Pseudomonas phage PA1phi           | Positive    | Kim <i>et al.</i> 2012.        |
| <i>Staphylococcus epidermidis</i> | <i>Staphylococcus</i> phage CNPH82 | Positive    | Edwards <i>et al.</i> 2015.    |
| <i>Staphylococcus epidermidis</i> | Pseudomonas phage PA1phi           | Negative    | Kim <i>et al.</i> 2012.        |
| <i>Streptococcus agalactiae</i>   | Pseudomonas phage PA1phi           | Negative    | Kim <i>et al.</i> 2012.        |
| <i>Streptococcus gordonii</i>     | Pseudomonas phage PA1phi           | Negative    | Kim <i>et al.</i> 2012.        |
| <i>Streptococcus pneumoniae</i>   | <i>Streptococcus</i> phage K13     | Positive    | Edwards <i>et al.</i> 2015.    |
| <i>Streptococcus pneumoniae</i>   | Pseudomonas phage PA1phi           | Negative    | Kim <i>et al.</i> 2012.        |
| <i>Streptococcus salivarius</i>   | Pseudomonas phage PA1phi           | Positive    | Kim <i>et al.</i> 2012.        |
| <i>Thermus thermophilus</i>       | <i>Thermus</i> phage TMA           | Positive    | Edwards <i>et al.</i> 2015.    |
| <i>Vibrio natriegens</i>          | <i>Vibrio</i> phage KVP40          | Positive    | Matsuza <i>et al.</i> 1992.    |
| <i>Vibrio parahaemolyticus</i>    | <i>Vibrio</i> phage KVP40          | Positive    | Matsuza <i>et al.</i> 1992.    |
| <i>Vibrio vulnificus</i>          | <i>Vibrio</i> phage KVP40          | Negative    | Matsuza <i>et al.</i> 1992.    |
| <i>Xylella fastidiosa</i>         | <i>Xylella</i> phage Xfas53        | Positive    | Edwards <i>et al.</i> 2015.    |
